# Supplementary material
Source: publisher site journal article supplement (https://www.dovepress.com/article/310862)
Supplement: Supplementary file 1 [file get_supplementary_file.php]

**Supplement data**

**Table S1:** Specifications and properties of contact lens materials used in the study

| Contact lens brand | Manufacturer | Oxygen transmissibility  (-300) Dk/t  x 10-9 barrer/cm | Material | Type | Main monomers | Water content  (%) | FDA group | Surface treatment | Hydrophilicity/  Hydrophobicity | Ionicity |
| --- | --- | --- | --- | --- | --- | --- | --- | --- | --- | --- |
|
| Sof Eye 1 day | Vision Science, Korea | 30 | Polymacon | Hydrogel | HEMA | 42 | I | None | hydrophilic | non-ionic |
| Biomedics 1 day plus | CooperVision, USA | 19.6 | Ocufilcon D | Hydrogel | HEMA, NVP, MA | 55 | IV | None | hydrophilic | ionic |
| Maxim soft 1 day | Sauflon Pharmaceutical,  UK | 86 | Somofilcon A  (Filcon II 3) | Silicone hydrogel | co-polymer of silicone containing TEGDMA | 56 | II | None | hydrophilic | non-ionic |
| Biotrue 1 day | Bausch & Lomb, USA | 42 | Nesofilcon A | Hydrogel  (Hypergel) | HEMA, NVP | 78 | II | None | hydrophilic | non-ionic |
| Sweety Plus | Dueba, Korea | 8.4 | Polymacon | Hydrogel | HEMA | 38 | I | Color printed | hydrophilic | non-ionic |

**Abbreviations**: HEMA, 2-hydroxyethyl methacrylate; MA, methacrylic acid; NVP, N-vinyl pyrrolidone; TEGDMA, tetraethylene glycol dimethacrylate

**Table S2:**  Contents and directions of multi-purpose disinfecting solution for CL care

| Disinfecting  solution | Contents | Manufacturer's Instructions | | | |
| --- | --- | --- | --- | --- | --- |
| Drop | Rub  (sec) | Rinse  (sec) | Soakage  (h) |
| Renu freshTM (MPS) | HYDRANATE® (hydroxyalkylphosphonate), boric acid, edetate disodium, poloxamine, sodium borate and sodium chloride; preserved with DYMED® (polyaminopropyl biguanide) 0.0001%. | 3 | 20 (rub) | 5 | ≥ 4 |
| - (no rub)***** |
| Bausch & Lomb® Sensitive Eyes Daily Cleaner (MPDS+EDSA) | Hydroxypropyl methylcellulose, poloxamine, sodium borate and sodium chloride; preserved with edetate disodium (0.5%) and sorbic acid (0.25%) | 3 | 20 | 10 | N/A |
| Opti Free Aldox (MPDS+PoA) | Sodium citrate, sodium chloride, boric acid, sorbitol, aminomethylpropanol, TETRONIC® 1304†, with edetate disodium 0.05%, preserved with POLYQUAD (polyquaternium-1) 0.001% and ALDOX (myristamidopropyl dimethylamine) 0.0005% | Thoroughly wet | 20 (rub) | 10 | ≥ 6 |
| - (no rub)***** |

*****; the manufacturer provided the alternative no-rub regimen.

**Determination of minimum inhibitory concentration (MIC) and minimum bactericidal concentration (MBC)**

Multipurpose solution (MPS), MPDS+PoA, and MPDS+EDSA were used as antimicrobial agents in this study. Antibacterial activity was measured by broth microdilution method according to the Clinical & Laboratory Standards Institute (CLSI) guidelines (2018). In 96-well microtiter plate, 20 µL of the agents were separately added and diluted by the two-fold serial dilution from their original concentration. The total volume was made up to 100 µL by adding 80 µl of Mueller-Hinton broth in each well. 100 µl of bacterial suspension (106 CFU/mL) were inoculated in the broth containing the extract and incubated at 37°C for 18 h. saline solution (NSS, 0.9% sodium chloride: NaCl) was included for negative control.

Minimum bactericidal concentration (MBC) was determined subsequently to the MIC assay. A 100 µL of aliquot from the wells with MIC value was seeded in TSA plate and incubated at 37°C for 18 h. The plates were observed for an appearance of bacterial growth and determination of MBC value. The experiment was carried out in triplicate.

**Results of MICs and MBCs**

The MIC and MBC values of CL care solutions were expressed in the term of fold-reduction of its original concentration (Table S3). The MPS, MPDS+PoA and MPDS+EDSA were tested against bacterial growth. The MPDS+PoA demonstrated antibacterial activity against staphylococcal strains with MIC and MBC values ranged from 0.0312-0.0625 and 0.0625-0.125-fold of the original concentration, respectively. Gram-negative bacterial strains were inhibited by the disinfecting solution with the MIC and MBC values ranged of 0.125-0.256 and 0.256-0.5-fold of the original concentration, respectively. The MIC values of MPS and MPDS+EDSA against all tested isolates ware ranging from 0.0625-0.5 and 0.0312-0.256-fold of the original concentration, respectively. The MPS and MPDS+EDSA possessed bactericidal activity with the MBC values ranged from 0.125-0.5 and 0.0625-0.5-fold of the original concentration, respectively.

**Table S3:** MICs and MBCs (fold of original concentration) of CL care solutions against pathogenic bacterial strains

| Bacterial strains | MIC/MBC values of CL care solutions  (fold of original concentration) | | |
| --- | --- | --- | --- |
| MPS | MPDS+PoA | MPDS+EDSA |
| *S. aureus* ATCC 29213 | 0.125/0.256 | 0.0625/0.0625 | 0.125/0.256 |
| *S. aureus* ATCC 25923 | 0.256/0.5 | 0.0625/0.125 | 0.256/0.256 |
| *S. epidermidis* ATCC 35984 | 0.0625/0.125 | 0.0312/0.0625 | 0.0312/0.0625 |
| *E. coli* ATCC 25922 | 0.256/0.5 | 0.125/0.256 | 0.256/0.5 |
| *K. pneumoniae* ATCC 700603 | 0.125/0.256 | 0.125/0.256 | 0.125/0.256 |
| *P. aeruginosa* ATCC 27853 | 0.5/0.5 | 0.256/0.5 | 0.125/0.256 |
